# Supplementary material
Source: PubMed Central journal article supplement (PMC3955276)
Supplement: NIHMS546329-supplement-supplementary_data.pdf [file NIHMS546329-supplement-supplementary_data.pdf]

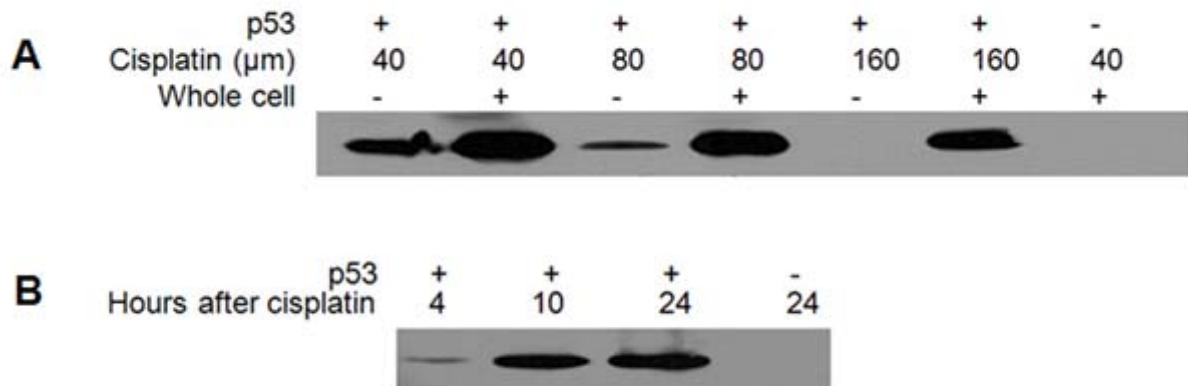

**Supplemental Figure 1** Effect of cisplatin on p53 expression level in HCT116 cells. (A) HCT116 cells were incubated with increasing amounts of cisplatin from 40  $\mu\text{M}$  to 160  $\mu\text{M}$  for 20 hours. The amount of p53 localized in both whole cells and pure nuclei were detected. (B) HCT116 cells were incubated with 40  $\mu\text{M}$  of cisplatin for 4 h, 10 h and 24 h. The amount of p53 in whole cells was detected. For both (A) and (B), equal amount of protein was loaded to all channels to cancel the influence of protein content.

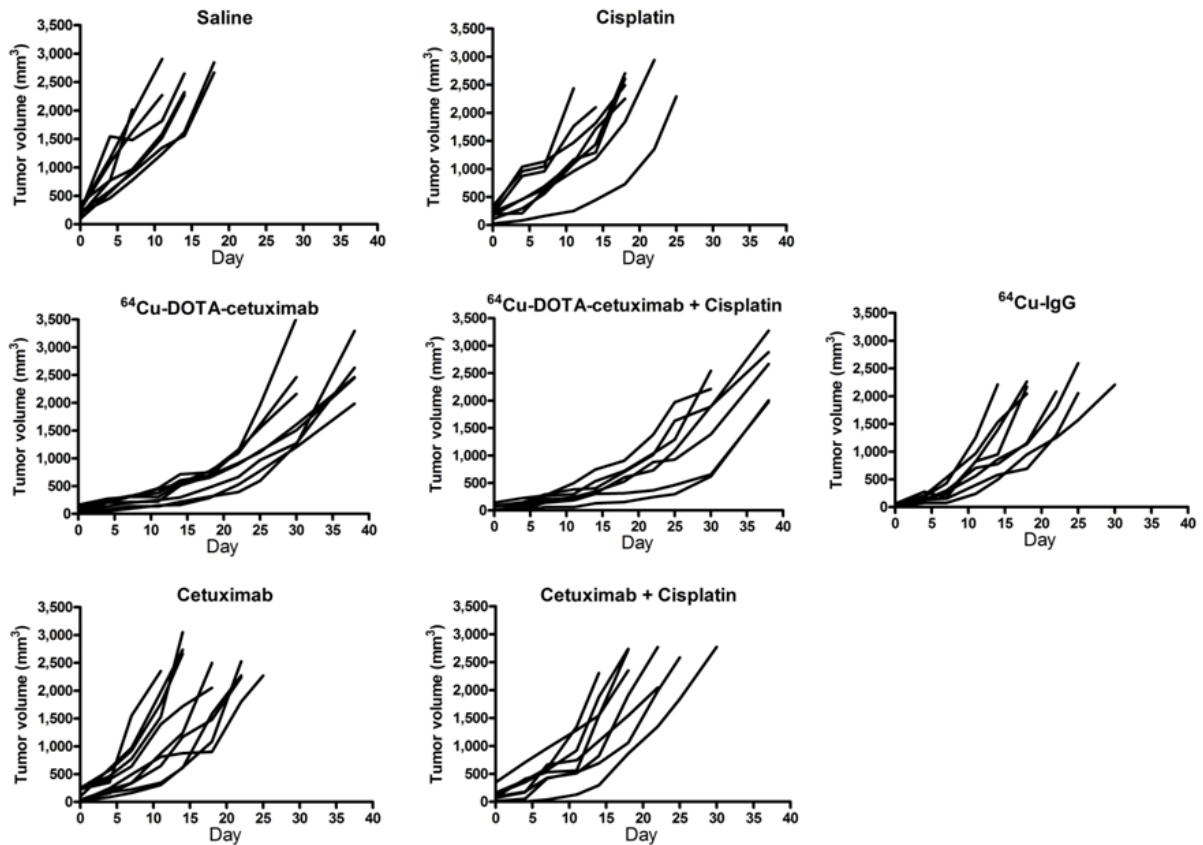

**Supplemental Figure 2** RIT experiments (individual mice in groups) in HCT116 +/+ tumor bearing nude mice.

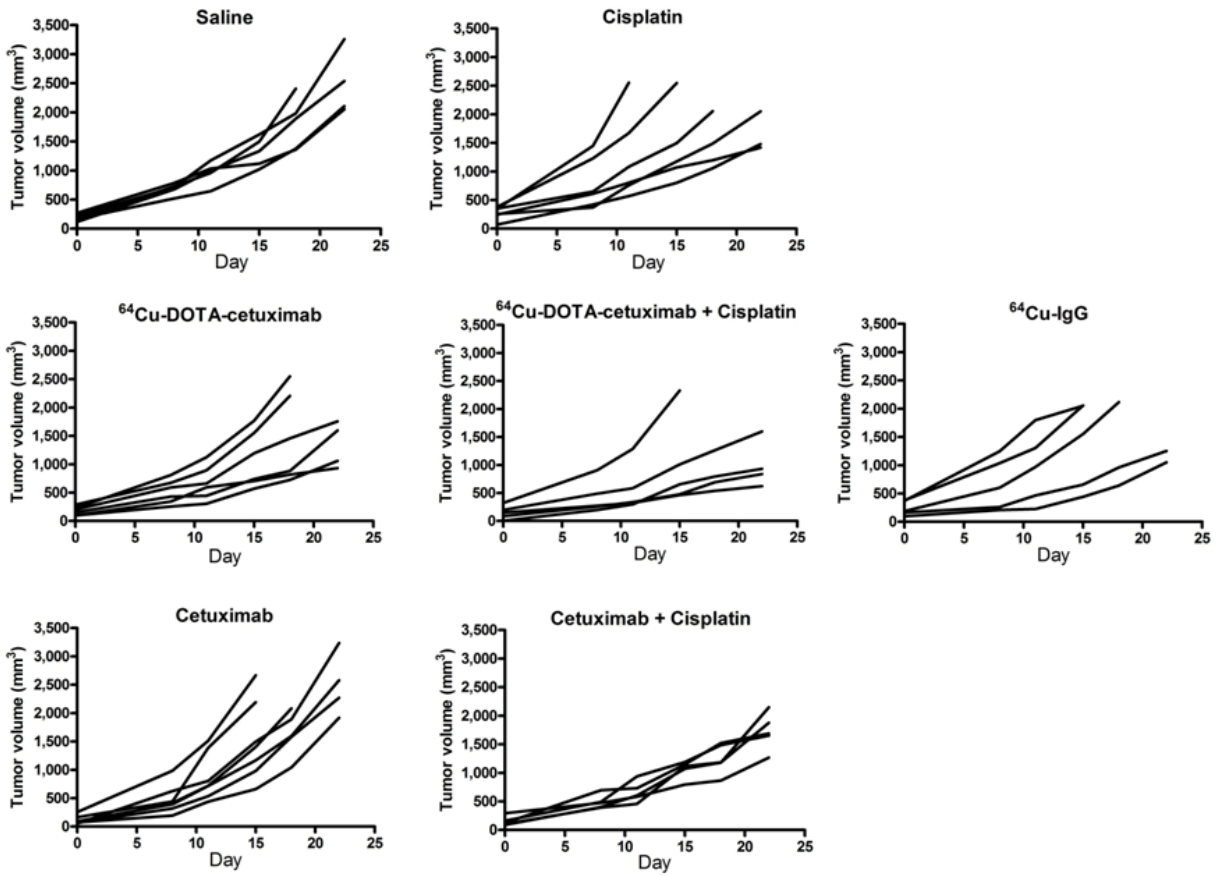

**Supplemental Figure 3** RIT experiments (individual mice in groups) in HCT116 <sup>-/-</sup> tumor bearing nude mice.
